# Supplementary material for: A Comparative Analysis of the Wound Healing-Related Heterogeneity of Adipose-Derived Stem Cells Donors
Source: MDPI journal article supplement (doi:10.3390/pharmaceutics14102126), 2022-10-06
Supplement: s1 [file s1]

# Supplementary Materials: A Comparative Analysis of the Wound Healing-related Heterogeneity of Adipose-derived Stem Cells Donors

Guoqiang Ren, Qiuyue Peng, Jeppe Emmersen, Vladimir Zachar, Trine Fink and Simone R. Porsborg

**Table S1.** The up-regulated gene information.

| Gene Symbol   | FPKM    |         |         | ASC-105 / ASC-101 |                | ASC-106 / ASC-101 |                   |
|---------------|---------|---------|---------|-------------------|----------------|-------------------|-------------------|
|               | ASC-101 | ASC-105 | ASC-106 | log2              | FDR            | log2              | FDR               |
| LIMS4         | 1.43    | 3.39    | 3.26    | 1.25              | 0.000559       | 1.19              | 0.000991          |
| POC1B-GALNT4  | 0       | 0.11    | 0.42    | 3.46              | 0.00556        | 5.39              | 0.00000000002     |
| CORO7-PAM16   | 0       | 0.13    | 0.17    | 3.70              | 0.02           | 4.09              | 0.00311           |
| FSBP          | 0.29    | 0.99    | 0.80    | 1.77              | 0.00000001     | 1.46              | 0.0000173         |
| U2AF1L5       | 3.44    | 10.03   | 8.59    | 1.54              | 0.000000000037 | 1.32              | 0.00000003        |
| LOC102724770* | 0       | 2.23    | 1.48    | 7.80              | 0.000000000024 | 7.21              | 0.0000001         |
| EFS*          | 2.69    | 11.17   | 7.90    | 2.05              | 4.1E-56        | 1.55              | 5.4E-26           |
| SPON1*#       | 6.03    | 19.22   | 18.12   | 1.67              | 2.1E-140       | 1.59              | 5.64E-119         |
| OLFM1         | 1.39    | 2.79    | 4.13    | 1.01              | 0.00478        | 1.57              | 0.000000001       |
| LINC01638     | 2.69    | 6.39    | 8.79    | 1.25              | 0.00119        | 1.71              | 0.0000006         |
| SLC12A7       | 0.61    | 2.25    | 1.85    | 1.88              | 1.9E-20        | 1.60              | 0.00000000000031  |
| STAG3         | 0.22    | 0.58    | 0.46    | 1.40              | 0.00217        | 1.06              | 0.03              |
| LOC107986352  | 0       | 0.13    | 0.23    | 3.70              | 0.01           | 4.52              | 0.000122          |
| CORO1A        | 0.21    | 0.71    | 1.01    | 1.76              | 0.03           | 2.27              | 0.000223          |
| LZTS1*        | 0.50    | 2.25    | 1.25    | 2.17              | 2.9E-26        | 1.32              | 0.0000002         |
| GALNT5        | 3.56    | 7.62    | 8.41    | 1.10              | 2,00E-23       | 1.24              | 1.4E-36           |
| MGAT4A        | 0.02    | 0.14    | 0.09    | 2.81              | 0.01           | 2.17              | 0.02              |
| CHRNA5        | 0.08    | 0.30    | 0.36    | 1.91              | 0.02           | 2.17              | 0.0041            |
| GBP5          | 0.08    | 0.39    | 0.33    | 2.29              | 0.000566       | 2.04              | 0.0041            |
| HSPA12B       | 0.10    | 0.37    | 0.44    | 1.89              | 0.01           | 2.14              | 0.0041            |
| WDR17         | 0.12    | 0.27    | 0.40    | 1.17              | 0.00000621     | 1.74              | 0.05              |
| COL4A4*       | 0.04    | 0.31    | 1.46    | 2.95              | 9.9E-57        | 5.19              | 0.00000000088     |
| COL10A1*      | 0.62    | 3.97    | 4.34    | 2.68              | 1.1E-42        | 2.81              | 4.2E-38           |
| COL11A1*#     | 6.65    | 17.44   | 14.44   | 1.39              | 1.2E-72        | 1.12              | 1.43E-130         |
| HAPLN1*       | 0       | 0.60    | 0.17    | 5.91              | 0.000451       | 4.09              | 0.000000000000061 |
| TMEM37        | 0.04    | 0.54    | 0.35    | 3.75              | 0.03           | 3.13              | 0.0019            |
| KRT80         | 0.08    | 0.32    | 0.33    | 2                 | 0.0041         | 2.04              | 0.00568           |
| PIK3R6*       | 0.08    | 0.46    | 0.71    | 2.52              | 0.0000007      | 3.15              | 0.000838          |
| CDC42EP5#     | 6.31    | 21.57   | 19.81   | 1.77              | 4.8E-21        | 1.65              | 1.3E-26           |
| TEKT4         | 0.17    | 0.88    | 0.58    | 2.37              | 0.02           | 1.77              | 0.00839           |
| GPAT2         | 1.59    | 3.38    | 3.26    | 1.09              | 0.0000005      | 1.04              | 0.0000001         |
| FGD5          | 0.33    | 1.11    | 0.67    | 1.75              | 0.0024         | 1.02              | 0.00000000021     |
| SPAAR         | 0.29    | 2.12    | 0.89    | 2.87              | 0.02           | 1.62              | 0.000000006       |
| COCH          | 0.43    | 1.19    | 1.25    | 1.47              | 0.0000697      | 1.54              | 0.000192          |
| MEGF6         | 0.26    | 2.39    | 0.95    | 3.20              | 0.00000000002  | 1.87              | 2,00E-52          |
| LCTL          | 1.74    | 3.95    | 3.48    | 1.18              | 0.000297       | 1                 | 0.00000009        |
| EPAS1*        | 3.56    | 7.40    | 7.92    | 1.06              | 1.5E-32        | 1.15              | 3.1E-27           |
| ETS2          | 3.11    | 6.68    | 7.56    | 1.10              | 1.8E-27        | 1.28              | 6.6E-19           |
| RNF152        | 0.10    | 0.40    | 0.27    | 2                 | 0.00169        | 1.43              | 0.00119           |
| FGF9*         | 0       | 0.11    | 0.11    | 3.46              | 0.01           | 3.46              | 0.01              |
| FGFR2*        | 0.12    | 0.64    | 0.34    | 2.42              | 0.01           | 1.50              | 0.00000148        |

|            |       |        |        |      |                          |      |                      |
|------------|-------|--------|--------|------|--------------------------|------|----------------------|
| FGFR4*     | 0.12  | 0.39   | 0.48   | 1.70 | 0.00243                  | 2    | 0.02                 |
| ITGA11*#   | 8.71  | 33.83  | 18.63  | 1.96 | 4.7E-75                  | 1.10 | 0,00E+00             |
| LIMCH1     | 0.19  | 1.27   | 0.67   | 2.74 | 0.0000005                | 1.82 | 8.2E-21              |
| PDZD2*     | 0.12  | 0.24   | 0.26   | 1    | 0.00206                  | 1.12 | 0.02                 |
| FLG        | 0.08  | 0.27   | 0.50   | 1.75 | 0.0000000000000000<br>37 | 2.64 | 0.0000124            |
| FRMD4B     | 0.58  | 1.47   | 1.76   | 1.34 | 0.0000000000092          | 1.60 | 0.0000002            |
| MTUS2      | 0.25  | 0.94   | 0.52   | 1.91 | 0.03                     | 1.06 | 0.0000007            |
| FMOD       | 4.01  | 15.95  | 8.61   | 1.99 | 1.3E-20                  | 1.10 | 1.5E-92              |
| PIK3R5     | 0.04  | 0.19   | 0.24   | 2.25 | 0.0042                   | 2.58 | 0.03                 |
| ARHGAP30   | 0.02  | 0.16   | 0.14   | 3    | 0.03                     | 2.81 | 0.02                 |
| FAM19A5    | 0.02  | 0.31   | 0.24   | 3.95 | 0.02                     | 3.58 | 0.00329              |
| GIMAP2     | 0.04  | 1.06   | 1.32   | 4.73 | 0.0000001                | 5.04 | 0.00000529           |
| TIAM2      | 0.53  | 1.20   | 1.93   | 1.18 | 8.2E-19                  | 1.86 | 0.00000171           |
| GREM1*#    | 60.46 | 241.70 | 183.35 | 2.00 | 0                        | 1.60 | 0,00E+00             |
| GNDF       | 2.30  | 5.81   | 5.14   | 1.34 | 4.1E-23                  | 1.16 | 3.6E-27              |
| GJB2       | 0.31  | 1.23   | 0.97   | 1.99 | 0.00123                  | 1.65 | 0.0000168            |
| GNAL       | 0.22  | 0.59   | 0.45   | 1.42 | 0.02                     | 1.03 | 0.000107             |
| NHLRC4     | 0.18  | 0.57   | 0.52   | 1.66 | 0.05                     | 1.53 | 0.03                 |
| CDRT4      | 0     | 0.51   | 0.39   | 5.67 | 0.000122                 | 5.29 | 0.00000579           |
| WDR62      | 0.46  | 0.93   | 1.27   | 1.02 | 0.000000004              | 1.47 | 0.00202              |
| TRIB2      | 2.34  | 6.39   | 5.42   | 1.45 | 1,00E-20                 | 1.21 | 9.9E-33              |
| GUCA1B     | 0     | 0.21   | 0.19   | 0.02 | 4.39                     | 0.02 | 4.25                 |
| HLA-DPA1   | 1.23  | 3.84   | 2.73   | 1.64 | 0.000000002              | 1.15 | 0.000271             |
| HLA-DPB1   | 0.36  | 0.76   | 1.35   | 1.08 | 0.00739                  | 1.91 | 0.000000002          |
| IGSF3      | 0.15  | 0.35   | 0.60   | 1.22 | 0.00736                  | 2    | 0.00000006           |
| TSPAN33    | 0.03  | 0.22   | 0.27   | 2.87 | 0.03                     | 3.17 | 0.05                 |
| FMN1       | 0.24  | 0.98   | 1.89   | 2.03 | 3.5E-21                  | 2.98 | 1.4E-59              |
| RBPMS2     | 0.43  | 1.21   | 1.55   | 1.49 | 0.00192                  | 1.85 | 0.0000212            |
| IL2RB      | 0.15  | 0.37   | 0.58   | 1.30 | 0.03                     | 1.95 | 0.000117             |
| ITGB8*     | 0.08  | 0.19   | 0.20   | 1.25 | 0.04                     | 1.32 | 0.01                 |
| KCNJ15     | 1.82  | 5.05   | 4.50   | 1.47 | 6,00E-24                 | 1.31 | 0.000000000000000029 |
| FAM174B    | 0.50  | 1.12   | 1.45   | 1.16 | 0.00647                  | 1.54 | 0.0000384            |
| LY75       | 0     | 0.06   | 0.18   | 2.58 | 0.03                     | 4.17 | 0.0000043            |
| MARK1      | 0.31  | 0.69   | 0.62   | 1.15 | 0.02                     | 1    | 0.02                 |
| MME#       | 31.88 | 70.20  | 86.26  | 1.14 | 5.25E-302                | 1.44 | 0,00E+00             |
| MMP1#      | 0.13  | 31.71  | 63.18  | 7.93 | 0                        | 8.92 | 0,00E+00             |
| MMP9*#     | 4.11  | 21.62  | 36.24  | 2.40 | 2.33E-111                | 3.14 | 3.84E-242            |
| MT1A       | 2.80  | 7.45   | 6.91   | 1.41 | 0.00493                  | 1.30 | 0.02                 |
| TNFRSF11B* | 0.13  | 0.90   | 0.97   | 2.79 | 0.00000609               | 2.90 | 0.00000168           |
| STMN3#     | 7.27  | 14.89  | 16.83  | 1.03 | 1.5E-24                  | 1.21 | 5,00E-34             |
| ADA2#      | 0.85  | 5.86   | 4.28   | 2.79 | 8.2E-59                  | 2.33 | 5.5E-34              |
| PGM5*      | 0.27  | 1.04   | 0.91   | 1.95 | 0.00000177               | 1.75 | 0.0000567            |
| SERPINA1   | 0.45  | 1.01   | 1.52   | 1.17 | 0.00269                  | 1.76 | 0.0000007            |
| SPA17      | 2.73  | 6.61   | 7.05   | 1.28 | 0.00000758               | 1.37 | 0.00000127           |
| CLIC6      | 0.47  | 2.32   | 1.55   | 2.30 | 2,00E-20                 | 1.72 | 0.000000003          |
| SPET4      | 0.52  | 2.35   | 1.75   | 2.18 | 0.0000003                | 1.75 | 0.00000001           |
| NMRK1      | 2.60  | 6.95   | 6.02   | 1.42 | 0.00000000000036         | 1.21 | 0.00000000000005     |
| NLRP2      | 0.05  | 0.39   | 0.40   | 2.96 | 0.00025                  | 3    | 0.000171             |
| GPRC5C     | 0.56  | 2.46   | 1.40   | 2.14 | 0.00000000019            | 1.32 | 0.00542              |
| PCDHB3*    | 0.05  | 0.30   | 0.24   | 2.58 | 0.00324                  | 2.26 | 0.02                 |
| PCDHB2*    | 0.28  | 1.37   | 0.86   | 2.29 | 0.00000003               | 1.62 | 0.00107              |
| ASPHD2     | 0.40  | 0.89   | 1.11   | 1.15 | 0.00479                  | 1.47 | 0.000083             |
| VANGL2     | 0.05  | 0.61   | 0.20   | 3.61 | 0.0000000000089          | 2    | 0.00684              |
| TENM2*     | 0.23  | 6.69   | 7.17   | 4.86 | 1.42E-268                | 4.96 | 2.36E-282            |
| PCDH19*    | 0.09  | 0.19   | 0.19   | 1.08 | 0.04                     | 1.08 | 0.05                 |

|           |       |       |       |      |                          |      |                |
|-----------|-------|-------|-------|------|--------------------------|------|----------------|
| CADM3*    | 0.09  | 2.76  | 0.30  | 4.94 | 2.4E-38                  | 1.74 | 0.00684        |
| PTPRB*    | 0.24  | 0.67  | 0.48  | 1.48 | 0.0000106                | 1    | 0.00729        |
| RARRES2#  | 7.05  | 62.86 | 52.14 | 3.16 | 5.96E-120                | 2.89 | 6.1E-87        |
| MRPL23#   | 9.72  | 36.92 | 40.75 | 1.93 | 1.5E-40                  | 2.07 | 1.1E-47        |
| CCL11*    | 1.32  | 6.88  | 3.42  | 2.38 | 0.000000000000047        | 1.37 | 0.00148        |
| GPSM3     | 1.46  | 3.61  | 3.14  | 1.31 | 0.000013                 | 1.10 | 0.000605       |
| SEMA3F    | 0.18  | 1.23  | 0.42  | 2.77 | 0.00000161               | 1.22 | 0.05           |
| GREM2     | 1.30  | 5.10  | 5.32  | 1.97 | 9.4E-38                  | 2.03 | 1.1E-39        |
| CBWD6     | 1.77  | 3.77  | 4.60  | 1.09 | 0.0000446                | 1.38 | 0.0000707      |
| LOC644634 | 0.07  | 0.43  | 0.28  | 2.62 | 0.000147                 | 2    | 0.01           |
| SLC1A4    | 4.03  | 12.27 | 12.24 | 1.61 | 3.5E-73                  | 1.60 | 2.7E-72        |
| WNK3      | 0.01  | 0.07  | 0.06  | 2.81 | 0.02                     | 2.58 | 0.02           |
| ACTR3C    | 0.17  | 0.56  | 0.96  | 1.72 | 0.00353                  | 2.50 | 0.00000001     |
| LRRC61    | 0.13  | 2.16  | 3.47  | 4.05 | 0.0000000000000000<br>93 | 4.74 | 4.3E-27        |
| STAT4     | 0.56  | 1.48  | 1.37  | 1.40 | 0.0000647                | 1.29 | 0.000432       |
| SULT1A1   | 0.44  | 1.56  | 1.49  | 1.83 | 0.00994                  | 1.76 | 0.00183        |
| TBX1*     | 0.35  | 2.82  | 4.08  | 3.01 | 0.0000000000000000<br>22 | 3.54 | 7.1E-27        |
| TCF21     | 0.10  | 0.83  | 0.63  | 3.05 | 0.000508                 | 2.66 | 0.000954       |
| TLE2      | 1.51  | 4.27  | 3.27  | 1.50 | 0.0000000000000048       | 1.11 | 0.0000005      |
| TNNT1     | 1.23  | 3.32  | 2.61  | 1.43 | 0.000131                 | 1.09 | 0.02           |
| TRPC3     | 0.01  | 0.33  | 0.15  | 5.04 | 0.0000575                | 3.91 | 0.02           |
| TRPM2     | 0     | 0.14  | 0.09  | 3.81 | 0.03                     | 3.17 | 0.04           |
| RGPD8     | 1.07  | 3.91  | 5.28  | 1.87 | 3.8E-47                  | 2.30 | 1.8E-82        |
| NUTM2D    | 0.12  | 0.35  | 0.29  | 1.54 | 0.00551                  | 1.27 | 0.03           |
| ALDH5A1   | 0.11  | 0.30  | 0.27  | 1.45 | 0.03                     | 1.30 | 0.05           |
| FSD1      | 0.77  | 2.28  | 1.67  | 1.57 | 0.0000117                | 1.12 | 0.00614        |
| CCNJL     | 0.11  | 0.35  | 0.41  | 1.67 | 0.04                     | 1.90 | 0.00924        |
| CLMN      | 0.16  | 1.01  | 0.72  | 2.66 | 0.00000000018            | 2.17 | 0.00000932     |
| SVEP1*    | 0.74  | 2.51  | 4.46  | 1.76 | 4.4E-48                  | 2.59 | 2.66E-135      |
| MYO15B    | 0.10  | 0.26  | 0.28  | 1.38 | 0.02                     | 1.49 | 0.02           |
| PDCD1LG2  | 0.22  | 0.70  | 1.14  | 1.67 | 0.00674                  | 2.37 | 0.00000247     |
| SLC19A3   | 0.02  | 0.16  | 0.20  | 3    | 0.02                     | 3.32 | 0.00533        |
| ITIH5     | 0.24  | 0.82  | 0.51  | 1.77 | 0.000000000047           | 1.09 | 0.00105        |
| LIMD2     | 2.66  | 9.84  | 6.94  | 1.89 | 1.3E-20                  | 1.38 | 0.00000004     |
| AP3B2     | 0.10  | 0.57  | 0.50  | 2.51 | 0.0000124                | 2.32 | 0.000135       |
| LRRC3     | 0.35  | 0.87  | 0.71  | 1.31 | 0.0000114                | 1.02 | 0.00166        |
| TCF7L1    | 1.67  | 3.46  | 3.37  | 1.05 | 0.0000006                | 1.01 | 0.00000189     |
| CCDC3     | 0.26  | 0.88  | 0.59  | 1.76 | 0.00022                  | 1.18 | 0.03           |
| FAM167A   | 0.21  | 1.08  | 0.72  | 2.36 | 0.00000000002            | 1.78 | 0.0000329      |
| ATG10     | 1.37  | 3.53  | 3.02  | 1.37 | 0.000837                 | 1.14 | 0.00785        |
| SYT15     | 0.37  | 0.90  | 0.89  | 1.28 | 0.0000139                | 1.27 | 0.000308       |
| OBSCN     | 0.05  | 0.12  | 0.10  | 1.26 | 0.000095                 | 1    | 0.00513        |
| ACSS1     | 0.60  | 1.40  | 1.94  | 1.22 | 0.0000429                | 1.69 | 0.000000000035 |
| ST6GAL2   | 0.09  | 0.23  | 0.22  | 1.35 | 0.00349                  | 1.29 | 0.00349        |
| FNDC1     | 0.56  | 8.02  | 4.42  | 3.84 | 4.17E-182                | 2.98 | 4,00E-78       |
| PYROXD2   | 2.12  | 5.93  | 5.16  | 1.48 | 0.000000000000003        | 1.28 | 0.000000000001 |
| GAS7      | 3.31  | 7.73  | 8.12  | 1.22 | 5.1E-56                  | 1.29 | 3.6E-62        |
| DISP2     | 0.16  | 0.74  | 0.68  | 2.21 | 0.00000007               | 2.09 | 0.0000008      |
| ZNF439    | 0.16  | 0.49  | 0.57  | 1.61 | 0.03                     | 1.83 | 0.00821        |
| RASL10B   | 0.12  | 0.34  | 0.44  | 1.50 | 0.03                     | 1.87 | 0.00383        |
| DEPDC7    | 1.70  | 3.73  | 4.96  | 1.13 | 0.0000168                | 1.54 | 0.00000000011  |
| HELB      | 0.51  | 1.06  | 1.02  | 1.06 | 0.00195                  | 1    | 0.000605       |
| SLIT2#    | 10.73 | 21.61 | 32.82 | 1.01 | 4.94E-107                | 1.61 | 0,00E+00       |
| LENG9     | 0.91  | 1.85  | 1.88  | 1.02 | 0.00627                  | 1.05 | 0.00449        |

|         |      |       |       |      |                          |      |                   |
|---------|------|-------|-------|------|--------------------------|------|-------------------|
| GNG8    | 0.18 | 0.44  | 0.71  | 1.29 | 0.03                     | 1.98 | 0.000129          |
| RPH3AL  | 0.23 | 0.87  | 1.04  | 1.92 | 0.000242                 | 2.18 | 0.00000674        |
| CD40    | 1.36 | 3.41  | 4.34  | 1.33 | 0.0000114                | 1.67 | 0.000000002       |
| CELSR1* | 0.16 | 1.10  | 0.39  | 2.78 | 3,00E-34                 | 1.29 | 0.000701          |
| TRIM14  | 0.89 | 2.66  | 3.98  | 1.58 | 0.0000000000000000<br>38 | 2.16 | 2.9E-35           |
| NUAK1*# | 6.82 | 27.15 | 14.97 | 1.99 | 0                        | 1.13 | 1.7E-78           |
| ARNT2   | 0.59 | 1.66  | 1.22  | 1.49 | 0.000000000000015        | 1.05 | 0.00000601        |
| CDC25C  | 0.85 | 1.78  | 3.81  | 1.07 | 0.00611                  | 2.16 | 0.000000000000032 |

ASC, adipose-derived stem cell; FPKM, fragments per kilobase of exon model per million reads mapped; FDR, the false discovery rate; \*, 31 significantly upregulated genes involved in wound healing-related processes based on Figure 5B; #, 14 most significantly upregulated genes based on Figure 5C.
